# Supplementary material for: Applying a Multicriteria Decision Analysis (MCDA) Approach to Elicit Stakeholders’ Preferences in Italy: The Case of Obinutuzumab for Rituximab-Refractory Indolent Non-Hodgkin Lymphoma (iNHL)
Source: Springer Nature journal article supplement (doi:10.1007/s41669-017-0048-x), 2017-08-22
Supplement: MOESM2 [file 24441636]

## Sheet: Sheet1
Scores for intervention
Experts/Evaluators	Evaluator 1	Evaluator 2	Evaluator 3	Evaluator 4	Evaluator 5	Evaluator 6	Evaluator 7	Evaluator 8	Evaluator 9	Evaluator 10	Evaluator 11	Evaluator 12	Evaluator 13	Evaluator 14	Evaluator 15	Evaluator 17	Evaluator 18	Evaluator 19	Evaluator 20			Scores: statistical analysis by criterion
Decision criteria	Payors (first go)					Clinicians (re-do)					Patients (first go)											Mean	Median	Std Dev	Min	Max	Mean - StdDev	Mean + StdDev
Disease severity	3	4	4	5	4	4	3	3	5	3	3.57143	3	4	3.57143	4	3	4	3	4			3.69173	4	0.64815	3	5	3.04358	4.33988	1
Size of affected population	3	2	2	1	1	4	4	4	3	5	2.57143	3	3	2.57143	4	1	3	3	1			2.74436	3	1.18147	1	5	1.56289	3.92583	2
Unmet needs	5	3	4	4	4	2	3	4	4	3	3.71429	3	4	3.71429	5	4	3	3	4			3.65414	4	0.741262	2	5	2.91287	4.3954	3
Comparative effectiveness	3	2	3	3	3	2	3	3	4	2	2.42857	4	2	2.42857	2	1	2	2	4			2.62406	2.42857	0.8154	1	4	1.80866	3.43946	4
Comparative safety/tolerability	-1	2	1	1	0	0	0	0	0	-2	1.85714	4	1	1.85714	3	0	3	-2	4			0.932331	1	1.76985	-2	4	-0.837515	2.70218	5
Comparative patient-perceived health / PRO	0	1	4	2	3	0	0	2	1	3	1.71429	5	-2	1.71429	4	-1	3	1	2			1.65414	1.71429	1.79336	-2	5	-0.139223	3.44749	6
Type of preventive benefit	3	4	3	0	1	0	0	0	4	2	2.71429	5	3	2.71429	4	1	4	2	0			2.18045	2.71429	1.67335	0	5	0.507103	3.8538	7
Type of therapeutic benefit	3	4	4	3	3	4	3	3	5	3	3.14286	5	3	3.14286	4	1	3	3	3			3.33083	3	0.880698	1	5	2.45013	4.21153	8
Comparative cost consequences – cost of intervention	-3	-2	-2	-4	-3	-2	-2	0	-2	0	-0.428571	4	-1	-0.428571	3	-3	0	-3	-3			-1.25564	-2	2.0738	-4	4	-3.32944	0.818158	9
Comparative cost consequences – other medical costs	0	-2	3	-5	3	0	0	0	-1	-1	-0.285714	3	-2	-0.285714	3	-3	3	-3	-3			-0.293233	-0.285714	2.42131	-5	3	-2.71455	2.12808	10
Comparative cost consequences – non-medical costs	2	-2	4	0	2	0	0	3	1	1	-0.571429	3	-2	-0.571429	3	-5	0	-3	0			0.308271	0	2.28336	-5	4	-1.97509	2.59163	11
Quality of evidence	3	3	4	3	3	3	4	3	4	4	2.71429	5	1	2.71429	3	1	3	3	3			3.07519	3	0.944453	1	5	2.13073	4.01964	12
Expert consensus/clinical practice guidelines	0	5	4	3	3	2	4	3	3	4	3	5	2	3	5	3	3	0	3			3.05263	3	1.39338	0	5	1.65925	4.44602	13
Weights (Hierarchical Point Allocation method)
	Data entry zone: enter weights given by each evaluator divided by 100 (ie, enter numbers between 0 and 1)
Experts/Evaluators	Evaluator 1	Evaluator 2	Evaluator 3	Evaluator 4	Evaluator 5	Evaluator 6	Evaluator 7	Evaluator 8	Evaluator 9	Evaluator 10	Evaluator 11	Evaluator 12	Evaluator 13	Evaluator 14	Evaluator 15	Evaluator 16	Evaluator 17	Evaluator 18	Evaluator 19			Weights (HPA method): statistical analysis by domain and by criterion
	Payors (first go)					Clinicians (re-do)					Patients (first go)											Mean	Median	Std Dev	Min	Max	Mean - StdDev	Mean + StdDev	Raw Mean (Range)
Domain 1: Need for intervention	0.3	0.2	0.35	0.25	0.1	0.5	0.5	0.1	0.25	0.3	0.4	0.25	0.1	0.15	0.5	0.05	0.2	0.25	0.3			0.265789	0.25	0.138497	0.05	0.5	0.127293	0.404286	26.6 (5–50)
Disease severity	0.15	0.4	0.4	0.35	0.45	0.5	0.5	0.4	0.35	0.4	0.2	0.4	0.35	0.4	0.7	0.4	0.5	0.34	0.4			0.399474	0.4	0.114527	0.15	0.7	0.284947	0.514	39.9 (15–70)	1
Size of affected population	0.15	0.3	0.2	0.25	0.1	0.3	0.4	0.25	0.35	0.2	0.2	0.2	0.15	0.4	0.2	0.1	0.4	0.33	0.4			0.256842	0.25	0.102201	0.1	0.4	0.154641	0.359043	25.7 (10–40)	2
Unmet needs	0.7	0.3	0.4	0.4	0.45	0.2	0.1	0.35	0.3	0.4	0.6	0.4	0.5	0.2	0.1	0.5	0.1	0.33	0.2			0.343684	0.35	0.168266	0.1	0.7	0.175418	0.51195	34.4 (10–70)	3
Domain 2: Comparative outcomes of intervention	0.25	0.2	0.15	0.25	0.25	0.2	0.2	0.5	0.25	0.3	0.4	0.35	0.4	0.3	0.2	0.2	0.2	0.25	0.2			0.265789	0.25	0.0898342	0.15	0.5	0.175955	0.355624	26.6 (15–50)
Comparative effectiveness	0.5	0.3	0.5	0.4	0.4	0.4	0.4	0.4	0.45	0.4	0.2	0.3	0.35	0.4	0.6	0.2	0.4	0.4	0.5			0.394737	0.4	0.0984529	0.2	0.6	0.296284	0.49319	39.5 (20–60)	4
Comparative safety/tolerability	0.3	0.3	0.3	0.35	0.3	0.3	0.3	0.3	0.35	0.4	0.2	0.3	0.15	0.4	0.3	0.35	0.4	0.4	0.2			0.310526	0.3	0.0698788	0.15	0.4	0.240648	0.380405	31.1 (15–40)	5
Comparative patient-perceived health / PRO	0.2	0.4	0.2	0.25	0.3	0.3	0.3	0.3	0.2	0.2	0.6	0.4	0.5	0.2	0.1	0.45	0.2	0.2	0.3			0.294737	0.3	0.125714	0.1	0.6	0.169023	0.420451	29.5 (10–60)	6
Domain 3: Type of benefit of intervention	0.1	0.2	0.15	0.15	0.25	0.1	0.15	0.1	0.1	0.15	0.2	0.2	0.1	0.35	0.1	0.05	0.3	0.25	0.3			0.173684	0.15	0.0839451	0.05	0.35	0.0897391	0.257629	17.4 (5–35)
Type of preventive benefit	0.5	0.5	0.3	0.6	0.4	0.4	0.5	0.5	0	0.3	0.5	0.5	0.4	0.4	0.8	0.1	0.3	0.6	0.5			0.426316	0.5	0.179016	0	0.8	0.2473	0.605332	42.6 (0–80)	7
Type of therapeutic benefit	0.5	0.5	0.7	0.4	0.6	0.6	0.5	0.5	1	0.7	0.5	0.5	0.6	0.6	0.2	0.9	0.7	0.4	0.5			0.573684	0.5	0.179016	0.2	1	0.394668	0.7527	57.4 (20–100)	8
Domain 4: Economic consequences of intervention	0.2	0.2	0.15	0.2	0.25	0.1	0.1	0.1	0.2	0.15	0	0.05	0.3	0.1	0.1	0.3	0.1	0.1	0.1			0.147368	0.1	0.0807494	0	0.3	0.066619	0.228118	14.7 (0–30)
Comparative cost consequences – cost of intervention	0.5	0.4	0.5	0.4	0.8	0.5	0.7	0.35	0.35	0.6	0.2	0.4	0.4	0.34	0.6	0.34	0.4	0.34	0.4			0.448421	0.4	0.143615	0.2	0.8	0.304806	0.592036	44.8 (20–80)	9
Comparative cost consequences – other medical costs	0.3	0.4	0.3	0.3	0.1	0.3	0.2	0.4	0.35	0.15	0.2	0.3	0.4	0.33	0.3	0.33	0.4	0.33	0.3			0.299474	0.3	0.0842268	0.1	0.4	0.215247	0.3837	29.9 (10–40)	10
Comparative cost consequences – non-medical costs	0.2	0.2	0.2	0.3	0.1	0.2	0.1	0.25	0.3	0.25	0.6	0.3	0.2	0.33	0.1	0.33	0.2	0.33	0.3			0.252105	0.25	0.114046	0.1	0.6	0.13806	0.366151	25.2 (10–60)	11
Domain 5: Knowledge about intervention	0.15	0.2	0.2	0.15	0.15	0.1	0.05	0.2	0.2	0.1	0	0.15	0.1	0.1	0.1	0.4	0.2	0.15	0.1			0.147368	0.15	0.0824515	0	0.4	0.0649169	0.22982	14.7 (0–40)
Quality of evidence	0.6	0.5	0.7	0.6	0.6	0.6	0.5	0.4	0.7	0.8	0.5	0.5	0.6	0.7	0.5	0.1	0.7	0.5	0.5			0.557895	0.6	0.150243	0.1	0.8	0.407651	0.708138	55.8 (10–80)	12
Expert consensus/clinical practice guidelines	0.4	0.5	0.3	0.4	0.4	0.4	0.5	0.6	0.3	0.2	0.5	0.5	0.4	0.3	0.5	0.9	0.3	0.5	0.5			0.442105	0.4	0.150243	0.2	0.9	0.291862	0.592349	44.2 (20–90)	13
